# Supplementary material for: Dielectric Characterization of Core-Shell Structured Poly(vinylidene fluoride)-grafted-BaTiO3 Nanocomposites
Source: MDPI journal article supplement (doi:10.3390/polym15030595), 2023-01-24
Supplement: s1 [file s1]

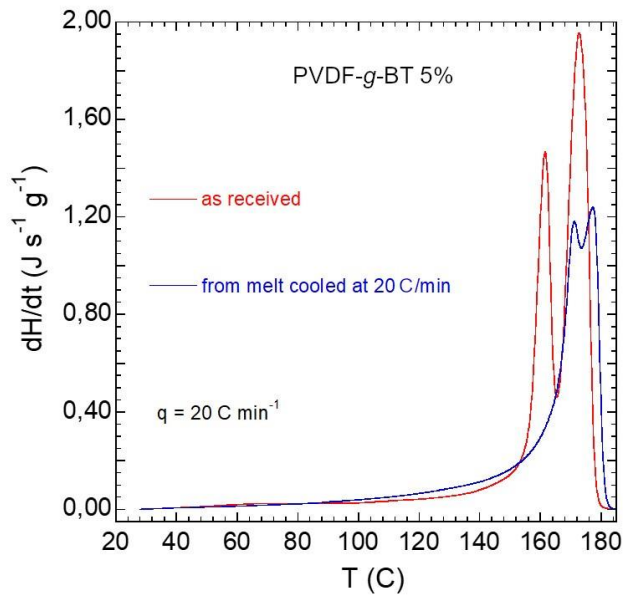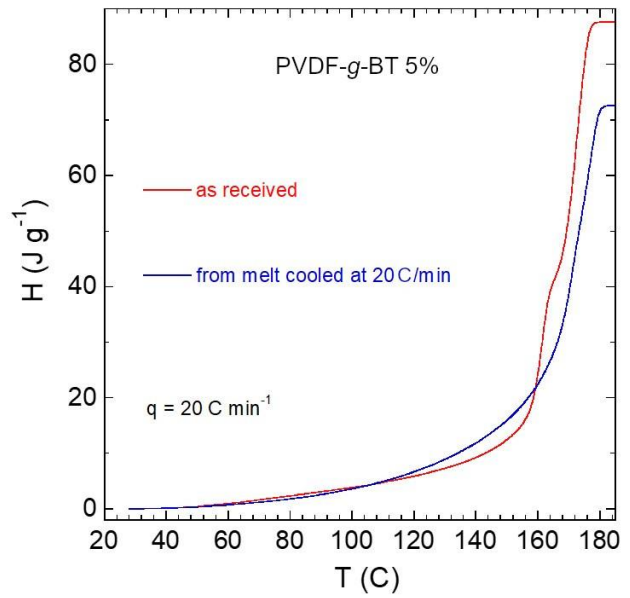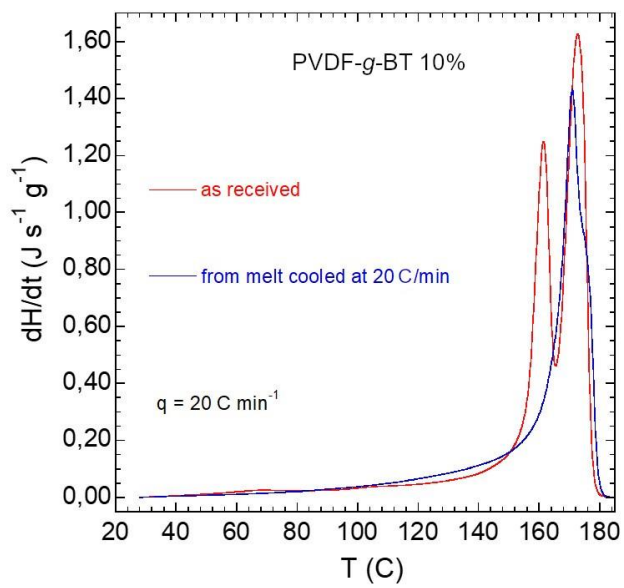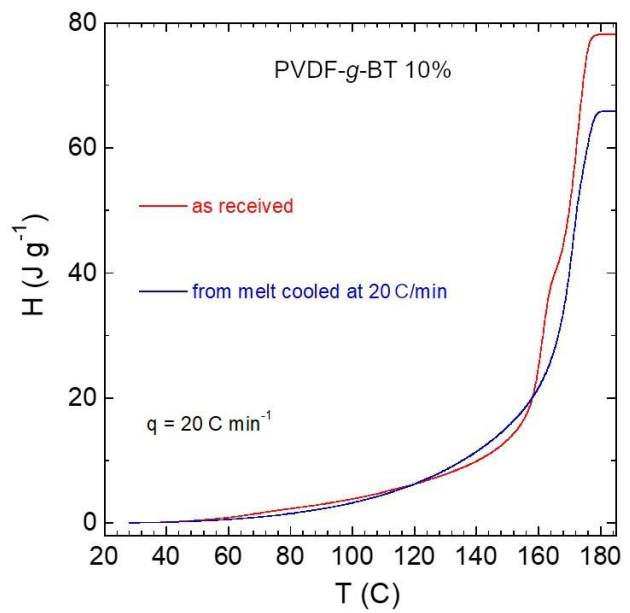

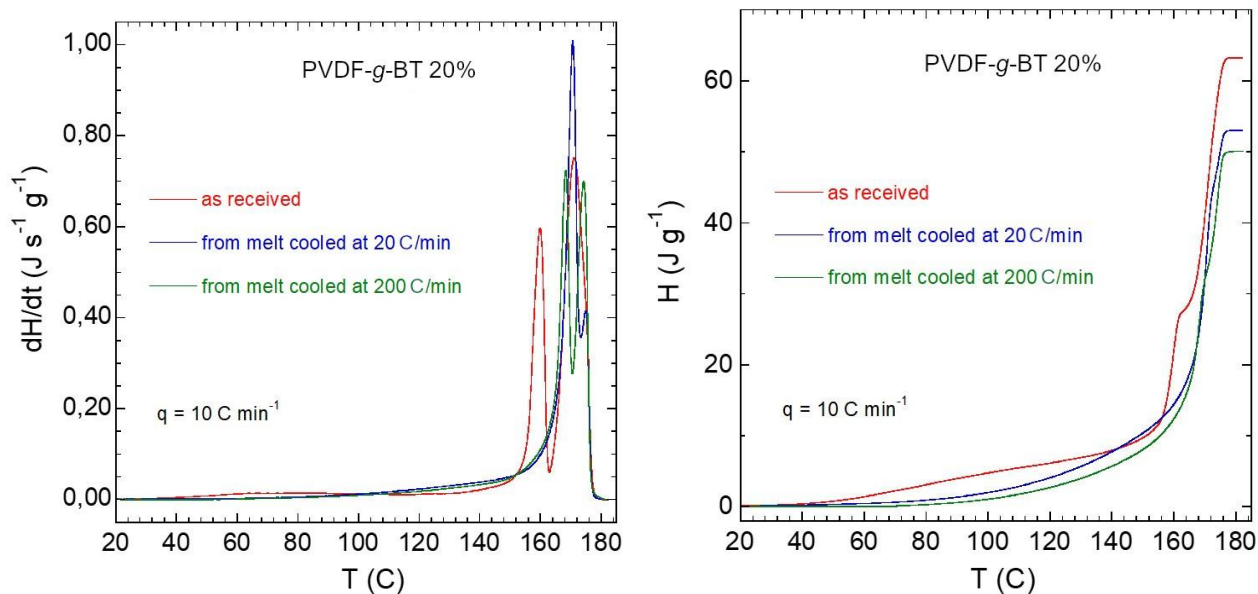

**Figure S1.** DSC thermograms of PVDF-g-BT nanocomposites: 5%, 10%, 20%.  $q$  indicates the heating rate.

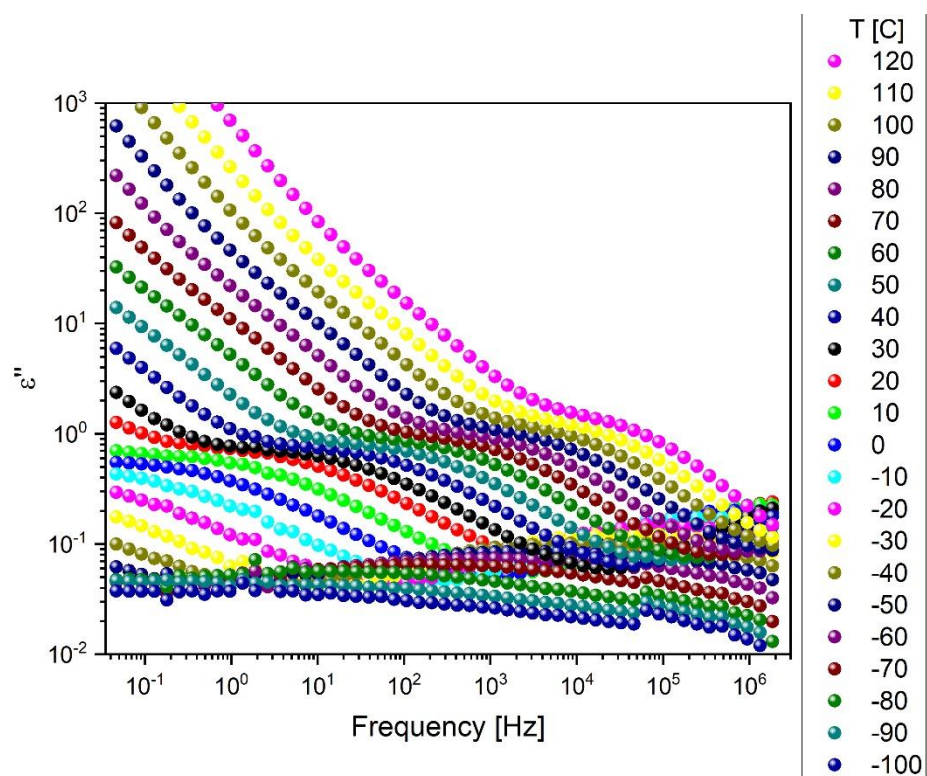

**Figure S2.** Dielectric loss BDS isothermal spectra of RAFT PVDF.

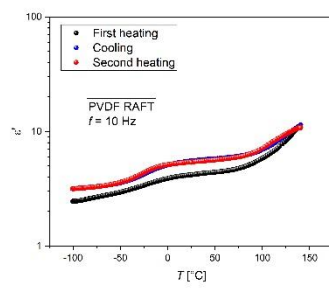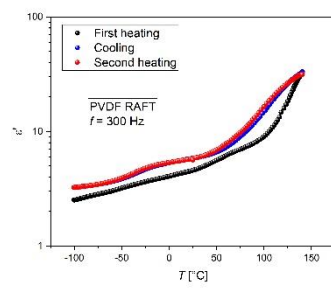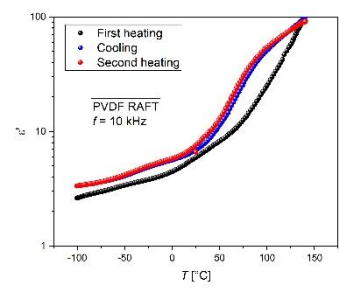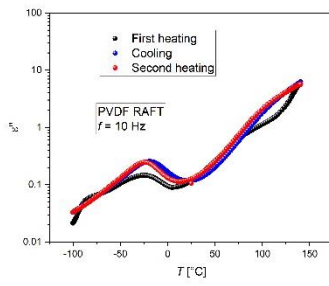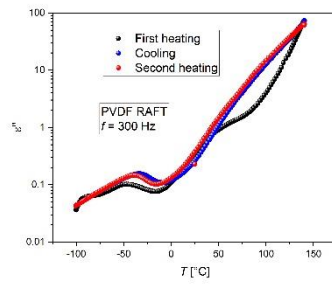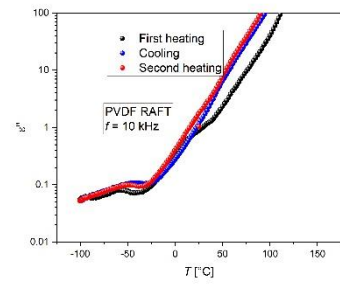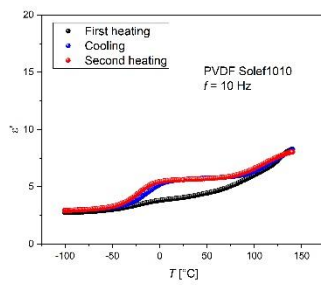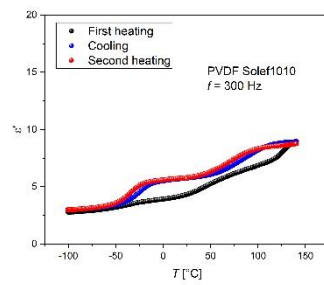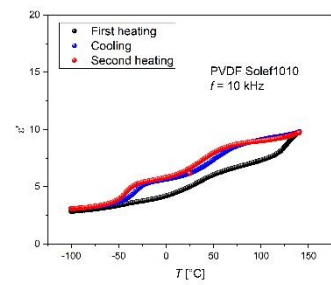

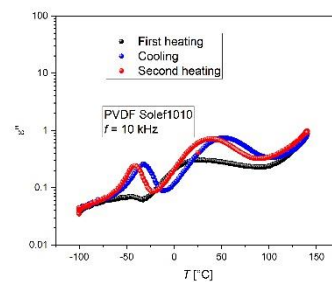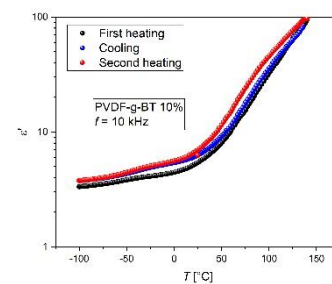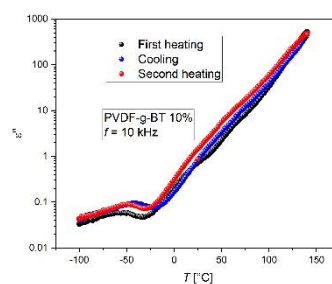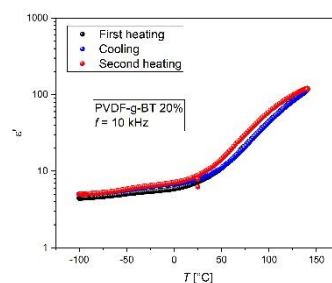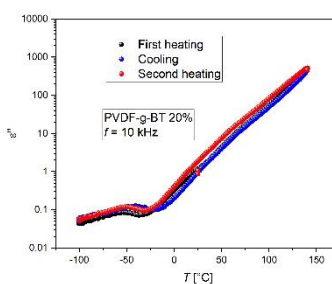

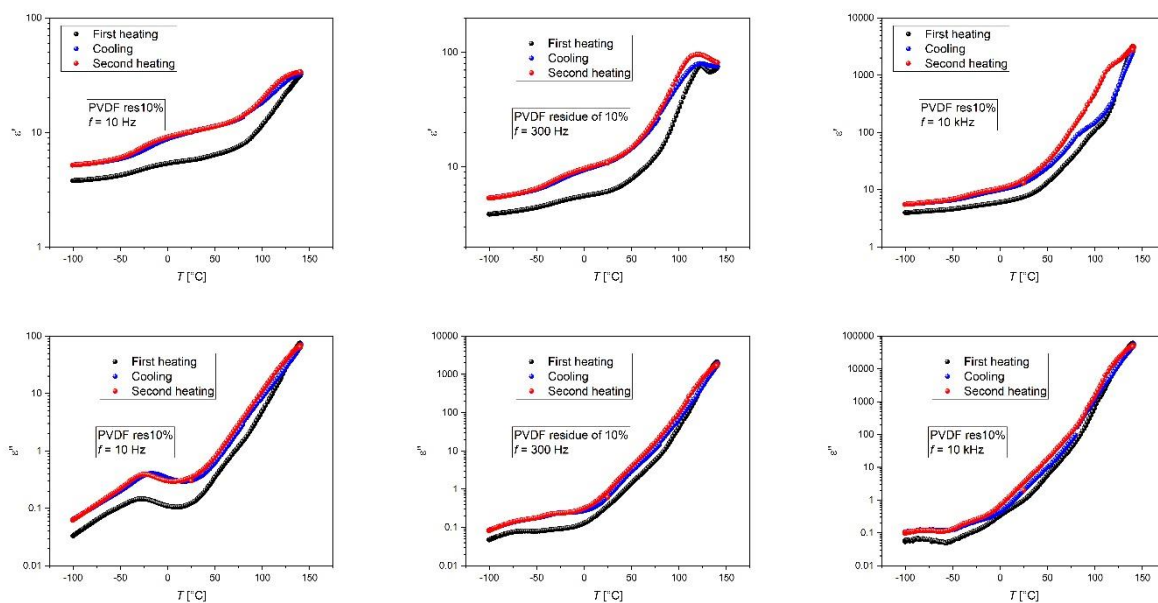

**Figure S3.** Isochronal dielectric spectra at three different frequencies (10 Hz, 300 Hz, 10 kHz), for the samples investigated in this work: PVDF RAFT, PVDF Solef®, PVDF-g-BT 10%, PVDF-g-BT 20%, and residual PVDF extracted from PVDF-g-BT 10%.

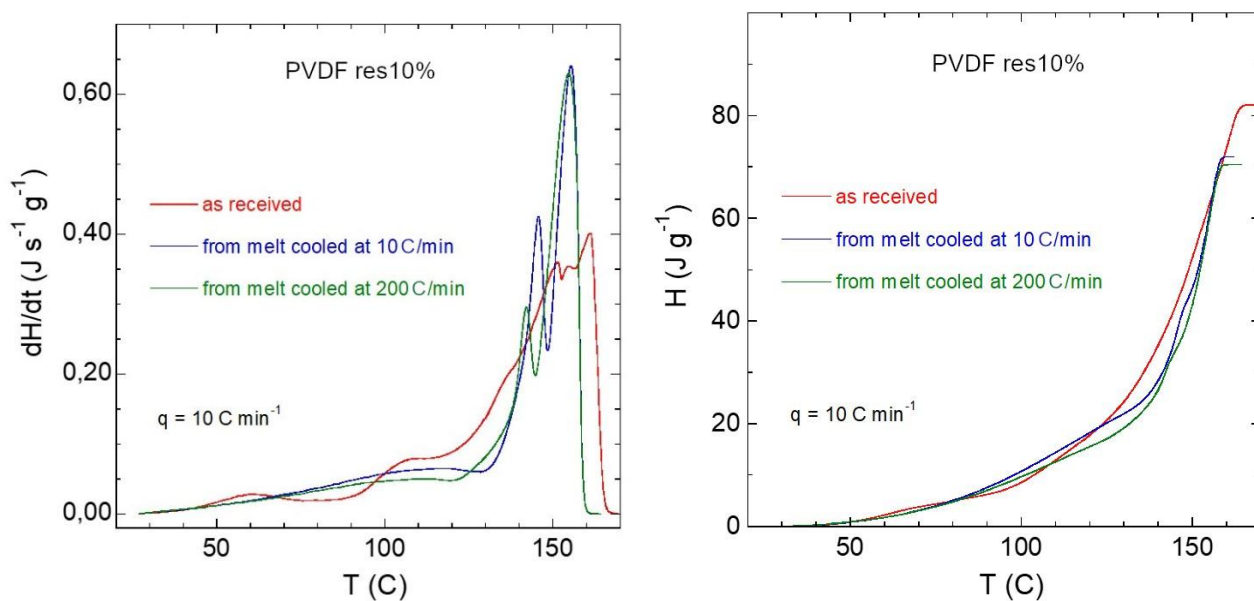

**Figure S4.** DSC thermograms of residual PVDF extracted from PVDF-g-BT 10%.  $q$  indicates the heating rate.
